# Supplementary figures and images for: Integrating Bio-Sensing Array with Blood Plasma Separation on a Centrifugal Platform
Source: MDPI journal article supplement (doi:10.3390/s23031710), 2023-02-03

[illegible]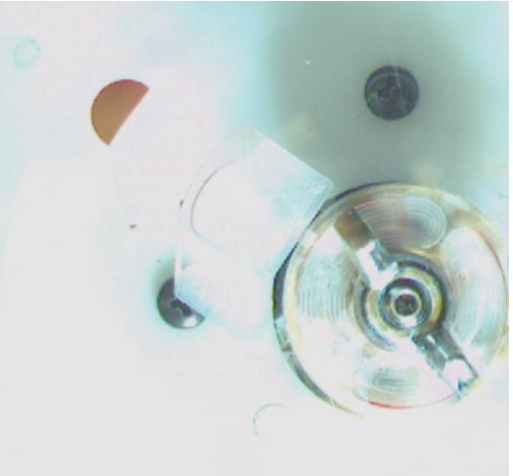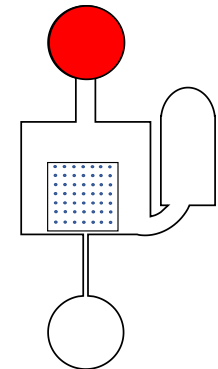

## APPENDIX S2, Dimensions of the standard CD on a 8 cm diameter PMMA CD, Noorozi et. al

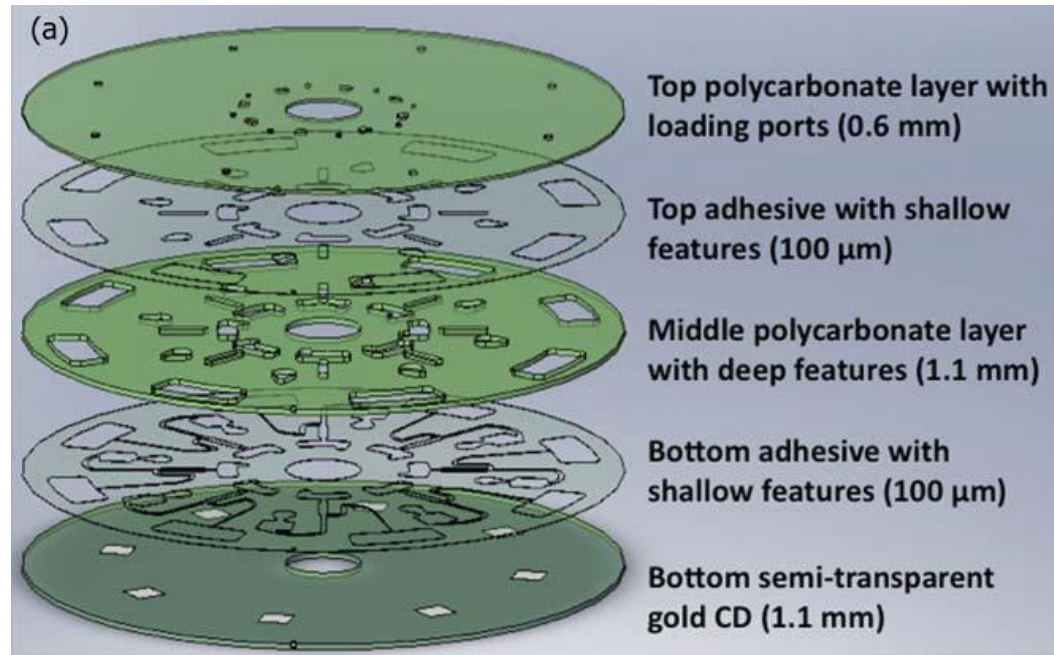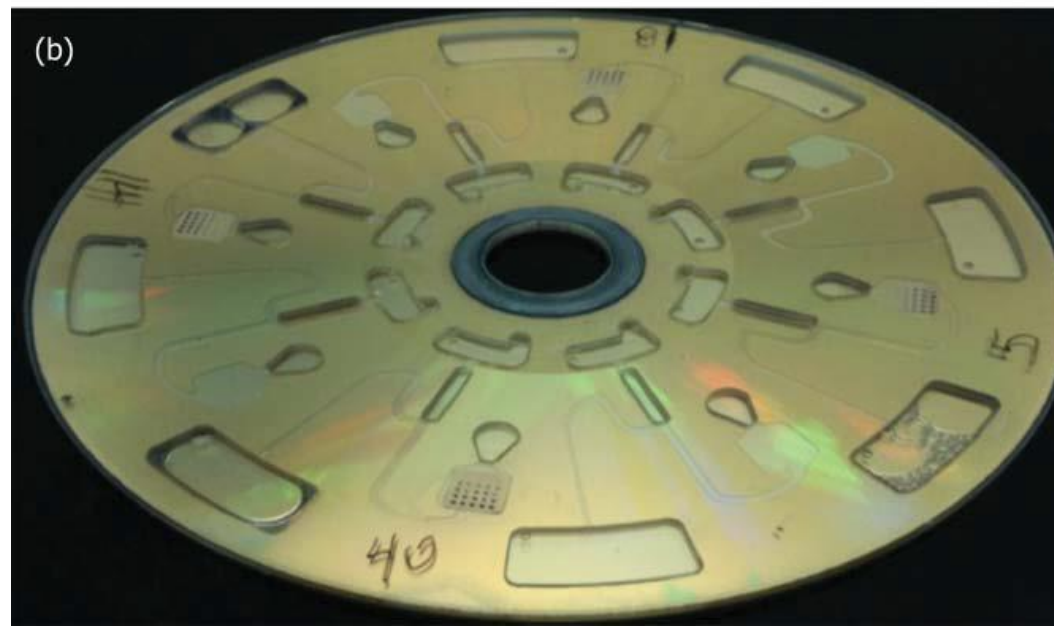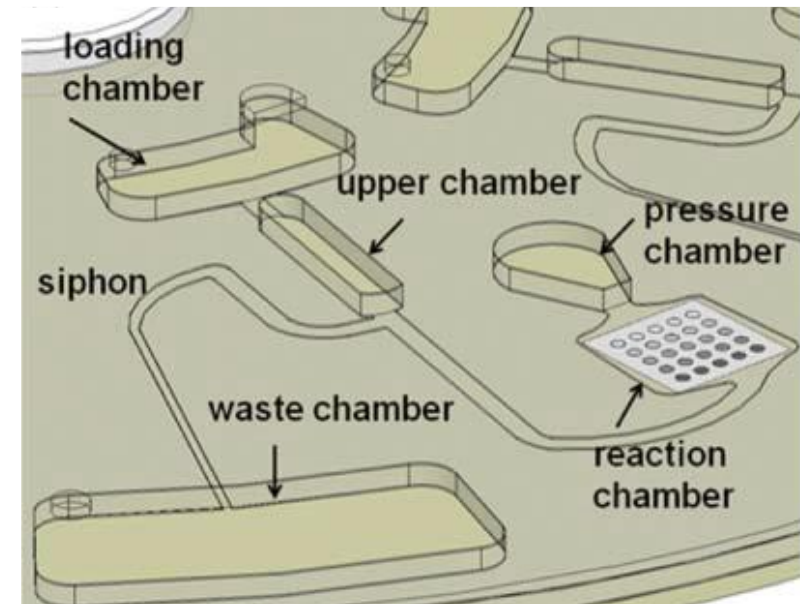

Supplement: s1 [file s1]
